# Supplementary material for: Ionic liquid microemulsion-mediated heterogels with bicontinuous conductive channels for an ionic flexible sensor
Source: Royal Society of Chemistry journal article supplement (doi:10.1039/d5ra09922f), 2026-01-01
Supplement: d5ra09922f1.pdf [file d5ra09922f1.pdf]

## **Ionic liquid microemulsion-mediated heterogels with bicontinuous conductive channels for ionic flexible sensor**

Yufan Wang, ‡ Yue Wang, ‡ Li Qin, Zhuo Zhang, Yang Yu\*

School of Chemistry and Chemical Engineering, Qilu Normal University,  
Jinan, 250200, China

\* Corresponding author.

*E-mail address:* [yuyang@qlnu.edu.cn](mailto:yuyang@qlnu.edu.cn)

‡These authors contributed equally to this work. They should thus be considered co-first authors.

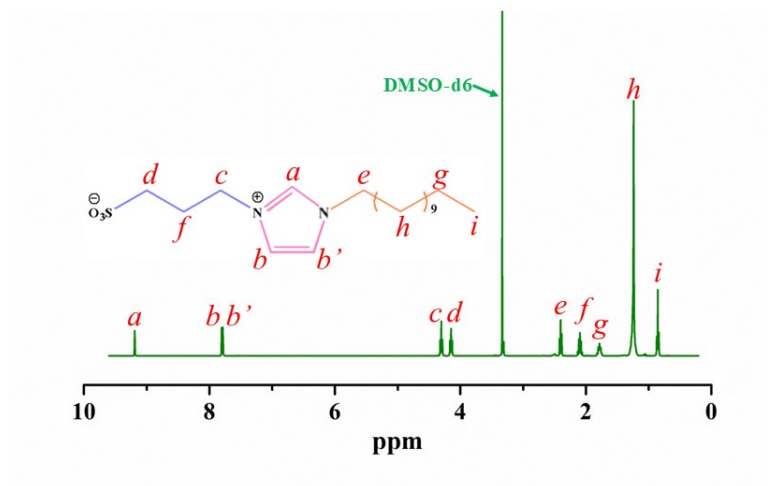

**Fig. S1** <sup>1</sup>H NMR spectrum and proton assignments of ZC12.

**Table S1** Sample composition.

| Sample                | ZC12<br>(wt%) | C2MImTFSI<br>(wt%) | C12-DMA<br>(wt%) | Photoinitiator<br>(wt%) <sup>a</sup> |
|-----------------------|---------------|--------------------|------------------|--------------------------------------|
| C <sub>12</sub> 30-10 | 10            | 60                 | 30               | 0.3                                  |
| C <sub>12</sub> 30-15 | 15            | 55                 | 30               | 0.3                                  |
| C <sub>12</sub> 30-20 | 20            | 50                 | 30               | 0.3                                  |
| C <sub>12</sub> 30-25 | 25            | 45                 | 30               | 0.3                                  |
| C <sub>12</sub> 30-30 | 30            | 40                 | 30               | 0.3                                  |
| C <sub>12</sub> 30-35 | 35            | 35                 | 30               | 0.3                                  |
| C <sub>12</sub> 30-40 | 40            | 30                 | 30               | 0.3                                  |

<sup>a</sup>UV initiator 0.3% w/w of monomers C12-DMA.

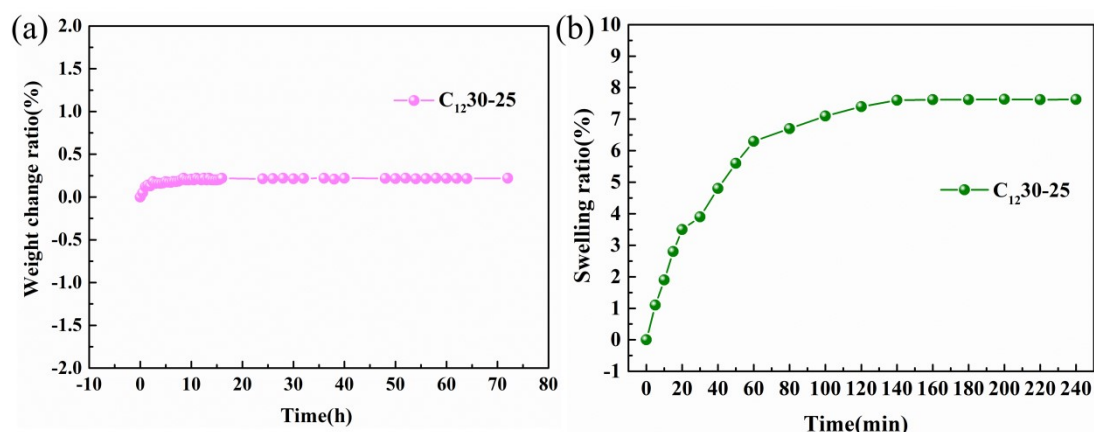

**Fig. S2** (a) The weight change over time of C<sub>12</sub>30-25 heterogel at ambient temperature 18°C~22°C and the humidity 40-56%. (b) The swelling ratio of C<sub>12</sub>30-25 heterogel in sweat.

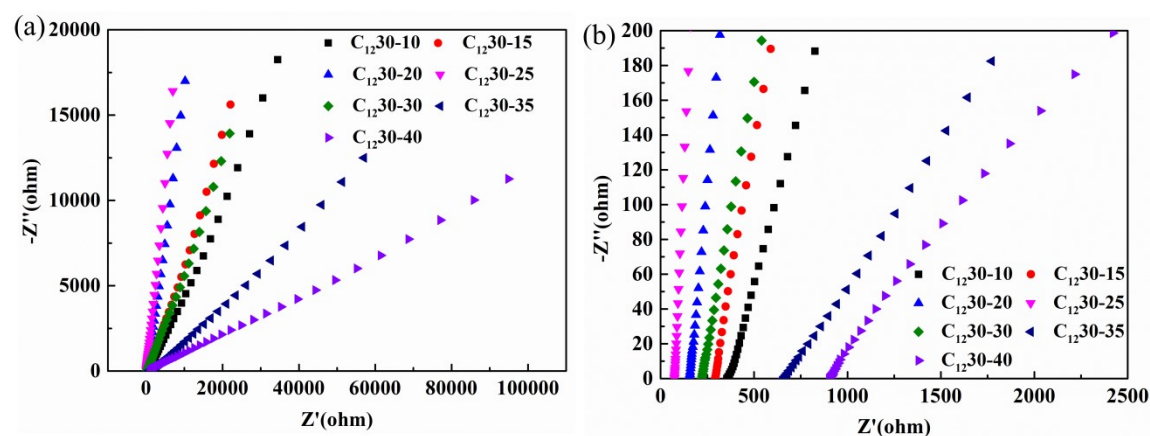

**Fig. S3** (a) The electrochemical impedance spectroscopy (EIS) of different heterogels; (b) High-frequency region of the EIS.

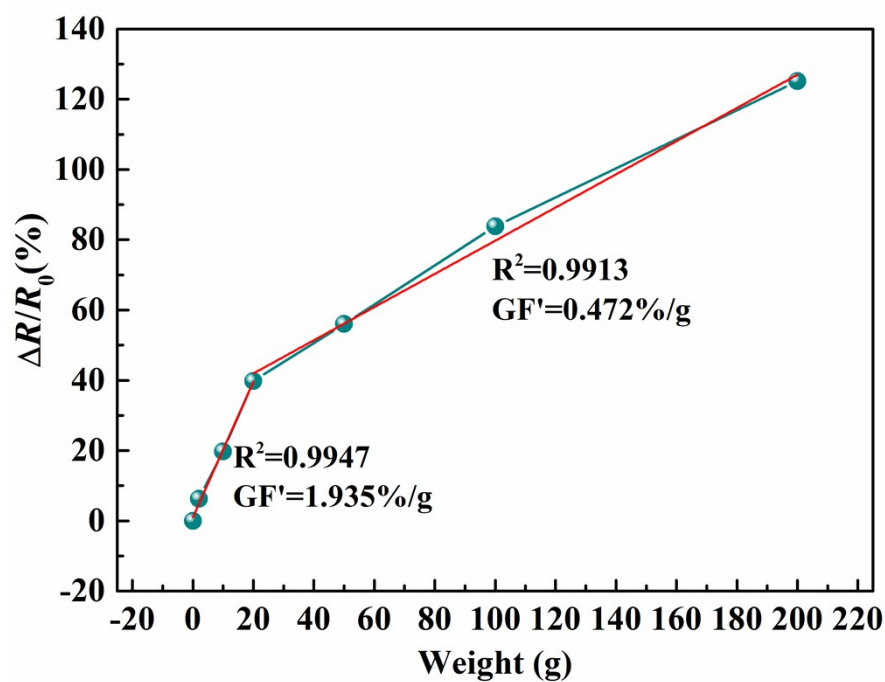

Fig. S4 The correlation curve between relative resistance change and weight.

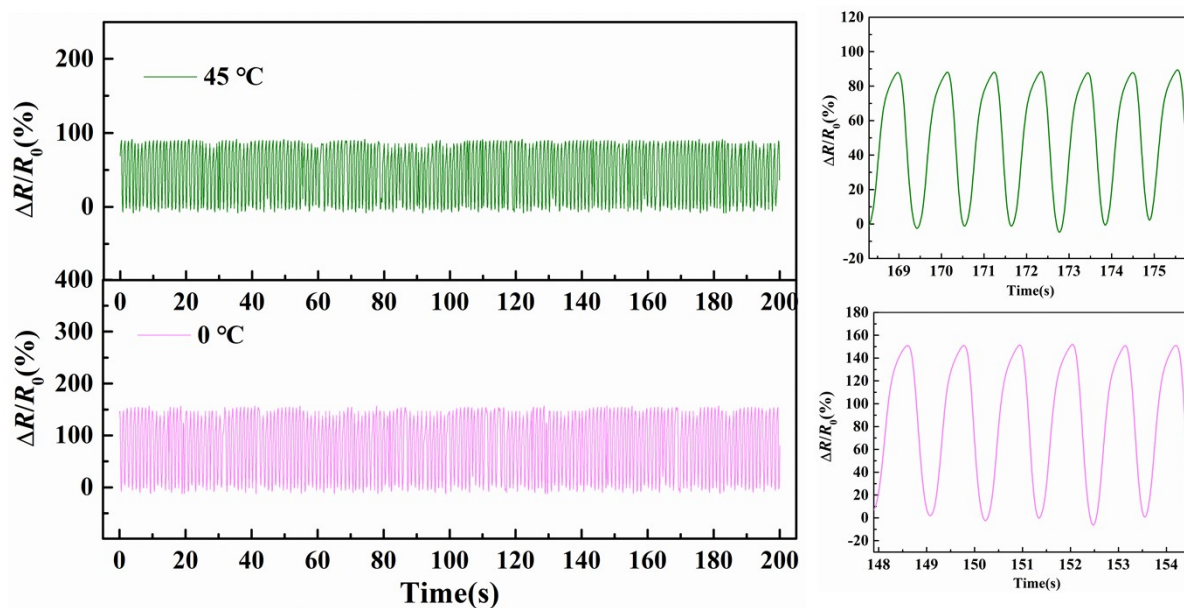

Fig. S5 Relative resistance changes when the finger was subjected to continuous 90° bending for 200 s at 0°C and 45°C, respectively.
